# Supplementary material for: The effects of the π–π stacking interactions on the patterns of gold nanoparticles formed at the air–water interface
Source: Royal Society of Chemistry journal article supplement (doi:10.1039/c2nr30286a), 2012-01-01
Supplement: c2nr30286a.pdf [file c2nr30286a.pdf]

## Electronic Supplementary Information

### Effects of the $\pi$ - $\pi$ Stacking Interactions on the Patterns of Gold Nanoparticles Formed at the Air/Water Interface

Han Jia<sup>a</sup>, Xiangtao Bai<sup>b</sup>, Lijuan Shi<sup>a</sup>, Fei Lu<sup>a</sup> and Liqiang Zheng<sup>a\*</sup>

a. Key Laboratory of Colloid and Interface Chemistry, Shandong University, Ministry  
of Education, Jinan, 250100, China.

b. General Research Institute for Nonferrous Metal, Beijing, 100088, China

Tel.: +86 531 88366062

Fax: +86 531 88564750

E-mail address: [lqzheng@sdu.edu.cn](mailto:lqzheng@sdu.edu.cn)

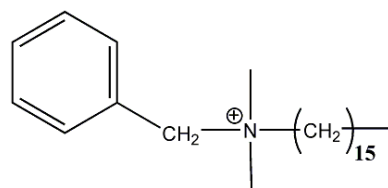

a: **BHDC**

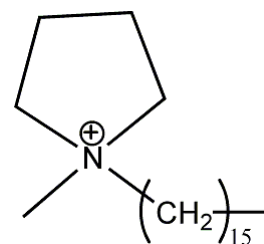

b: **C<sub>16</sub>MPB**

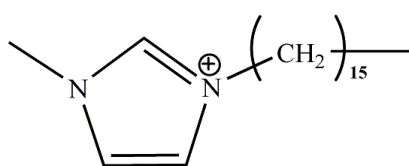

c: **C<sub>16</sub>mimBr**

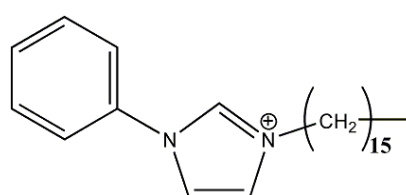

d: **C<sub>16</sub>pimBr**

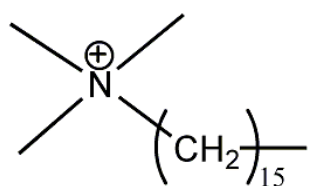

e: **CTAB**

Figure S1. Molecular structures of the five capping agents.

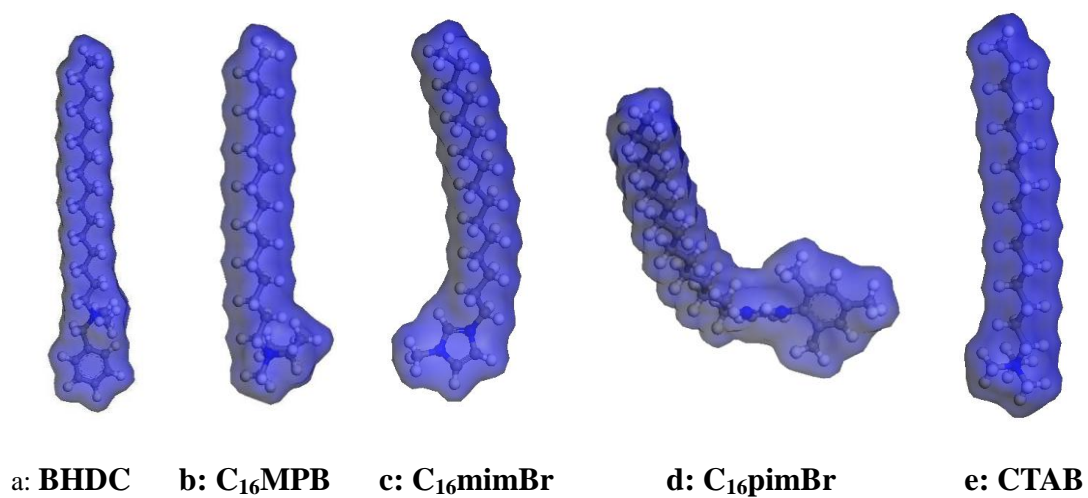

Figure S2. Optimized conformers of the five capping agents.
